# Supplementary material for: Avian influenza A virus susceptibility, infection, transmission, and antibody kinetics in European starlings
Source: PLoS Pathog. 2021 Aug 30;17(8):e1009879. doi: 10.1371/journal.ppat.1009879 (PMC8432794; doi:10.1371/journal.ppat.1009879)
Supplement: S6 Data — These data are associated with Fig 7 in the manuscript. Column headers are as follows: TREATMENT = inoculated (all contact birds were negative and are not included). BAND = unique leg band associated with each individual. DPI = Day post inoculation. TYPE = sample type collected. ORAL = oral swab, CLOACAL = cloacal swab. MeanQTY = viral RNA concentration based on calibrated EID50/mL equivalents. Value is the mean of duplicate qPCR wells. MeanQTY+1 = MeanQTY + 1. Log(MeanQTY+1) = log based 10 of MeanQTY+1. (CSV) [file ppat.1009879.s006.csv]

TREATMENT	BAND	DPI	TYPE	MeanQTY	MeanQTY+1	log(MeanQTY+1)
Inoculated	108	1	Cloacal	0	1	0
Inoculated	108	2	Cloacal	0	1	0
Inoculated	108	3	Cloacal	0	1	0
Inoculated	108	4	Cloacal	0	1	0
Inoculated	108	5	Cloacal	260.37	261.37	2.42
Inoculated	108	6	Cloacal	0	1	0
Inoculated	108	7	Cloacal	0	1	0
Inoculated	109	1	Cloacal	33.29	34.29	1.54
Inoculated	109	2	Cloacal	58.49	59.49	1.77
Inoculated	109	3	Cloacal	0	1	0
Inoculated	109	4	Cloacal	2	3	0.48
Inoculated	109	5	Cloacal	191.35	192.35	2.28
Inoculated	109	6	Cloacal	23.42	24.42	1.39
Inoculated	109	7	Cloacal	0	1	0
Inoculated	111	1	Cloacal	0	1	0
Inoculated	111	2	Cloacal	0	1	0
Inoculated	111	3	Cloacal	102.73	103.73	2.02
Inoculated	111	4	Cloacal	0	1	0
Inoculated	111	5	Cloacal	0	1	0
Inoculated	111	6	Cloacal	0	1	0
Inoculated	111	7	Cloacal	0	1	0
Inoculated	112	1	Cloacal	123.04	124.04	2.09
Inoculated	112	2	Cloacal	0	1	0
Inoculated	112	3	Cloacal	2.28	3.28	0.52
Inoculated	112	4	Cloacal	2.17	3.17	0.5
Inoculated	112	5	Cloacal	0	1	0
Inoculated	112	6	Cloacal	0	1	0
Inoculated	112	7	Cloacal	0	1	0
Inoculated	113	1	Cloacal	425.83	426.83	2.63
Inoculated	113	2	Cloacal	15.77	16.77	1.22
Inoculated	113	3	Cloacal	167.88	168.88	2.23
Inoculated	113	4	Cloacal	0	1	0
Inoculated	113	5	Cloacal	0	1	0
Inoculated	113	6	Cloacal	0	1	0
Inoculated	113	7	Cloacal	0	1	0
Inoculated	114	1	Cloacal	0	1	0
Inoculated	114	2	Cloacal	0	1	0
Inoculated	114	3	Cloacal	0	1	0
Inoculated	114	4	Cloacal	0	1	0
Inoculated	114	5	Cloacal	0	1	0
Inoculated	114	6	Cloacal	0	1	0
Inoculated	114	7	Cloacal	0	1	0
Inoculated	117	1	Cloacal	470.61	471.61	2.67
Inoculated	117	2	Cloacal	0	1	0
Inoculated	117	3	Cloacal	0	1	0
Inoculated	117	4	Cloacal	0	1	0
Inoculated	117	5	Cloacal	0	1	0
Inoculated	117	6	Cloacal	0	1	0
Inoculated	117	7	Cloacal	0	1	0
Inoculated	118	1	Cloacal	4.9	5.9	0.77
Inoculated	118	2	Cloacal	5485.45	5486.45	3.74
Inoculated	118	3	Cloacal	889.91	890.91	2.95
Inoculated	118	4	Cloacal	2.27	3.27	0.51
Inoculated	118	5	Cloacal	0	1	0
Inoculated	118	6	Cloacal	0	1	0
Inoculated	118	7	Cloacal	0	1	0
Inoculated	119	1	Cloacal	25.66	26.66	1.43
Inoculated	119	2	Cloacal	0	1	0
Inoculated	119	3	Cloacal	0	1	0
Inoculated	119	4	Cloacal	0	1	0
Inoculated	119	5	Cloacal	0	1	0
Inoculated	119	6	Cloacal	0	1	0
Inoculated	119	7	Cloacal	0	1	0
Inoculated	121	1	Cloacal	0	1	0
Inoculated	121	2	Cloacal	0	1	0
Inoculated	121	3	Cloacal	0	1	0
Inoculated	121	4	Cloacal	2.14	3.14	0.5
Inoculated	121	5	Cloacal	0	1	0
Inoculated	121	6	Cloacal	0	1	0
Inoculated	121	7	Cloacal	1.22	2.22	0.35
Inoculated	122	1	Cloacal	211.71	212.71	2.33
Inoculated	122	2	Cloacal	0	1	0
Inoculated	122	3	Cloacal	0	1	0
Inoculated	122	4	Cloacal	0	1	0
Inoculated	122	5	Cloacal	2.37	3.37	0.53
Inoculated	122	6	Cloacal	3.68	4.68	0.67
Inoculated	122	7	Cloacal	0	1	0
Inoculated	124	1	Cloacal	54.55	55.55	1.74
Inoculated	124	2	Cloacal	0	1	0
Inoculated	124	3	Cloacal	0	1	0
Inoculated	124	4	Cloacal	0	1	0
Inoculated	124	5	Cloacal	2.01	3.01	0.48
Inoculated	124	6	Cloacal	0.63	1.63	0.21
Inoculated	124	7	Cloacal	0	1	0
Inoculated	126	1	Cloacal	345.38	346.38	2.54
Inoculated	126	2	Cloacal	8.08	9.08	0.96
Inoculated	126	3	Cloacal	0	1	0
Inoculated	126	4	Cloacal	36.77	37.77	1.58
Inoculated	126	5	Cloacal	0	1	0
Inoculated	126	6	Cloacal	0.85	1.85	0.27
Inoculated	126	7	Cloacal	1.44	2.44	0.39
Inoculated	128	1	Cloacal	0	1	0
Inoculated	128	2	Cloacal	0	1	0
Inoculated	128	3	Cloacal	0	1	0
Inoculated	128	4	Cloacal	0	1	0
Inoculated	128	5	Cloacal	0	1	0
Inoculated	128	6	Cloacal	0	1	0
Inoculated	128	7	Cloacal	0	1	0
Inoculated	129	1	Cloacal	18.03	19.03	1.28
Inoculated	129	2	Cloacal	0	1	0
Inoculated	129	3	Cloacal	0	1	0
Inoculated	129	4	Cloacal	0	1	0
Inoculated	129	5	Cloacal	0	1	0
Inoculated	129	6	Cloacal	0	1	0
Inoculated	129	7	Cloacal	0	1	0
Inoculated	130	1	Cloacal	9.76	10.76	1.03
Inoculated	130	2	Cloacal	6.24	7.24	0.86
Inoculated	130	3	Cloacal	0	1	0
Inoculated	130	4	Cloacal	0	1	0
Inoculated	130	5	Cloacal	1.68	2.68	0.43
Inoculated	130	6	Cloacal	0	1	0
Inoculated	130	7	Cloacal	0	1	0
Inoculated	135	1	Cloacal	3128.74	3129.74	3.5
Inoculated	135	2	Cloacal	0	1	0
Inoculated	135	3	Cloacal	0	1	0
Inoculated	135	4	Cloacal	1.92	2.92	0.46
Inoculated	135	5	Cloacal	5.07	6.07	0.78
Inoculated	135	6	Cloacal	0	1	0
Inoculated	135	7	Cloacal	0	1	0
Inoculated	139	1	Cloacal	141.37	142.37	2.15
Inoculated	139	2	Cloacal	0	1	0
Inoculated	139	3	Cloacal	0	1	0
Inoculated	139	4	Cloacal	0	1	0
Inoculated	139	5	Cloacal	0	1	0
Inoculated	139	6	Cloacal	0	1	0
Inoculated	139	7	Cloacal	0	1	0
Inoculated	140	1	Cloacal	0	1	0
Inoculated	140	2	Cloacal	0	1	0
Inoculated	140	3	Cloacal	0	1	0
Inoculated	140	4	Cloacal	0	1	0
Inoculated	140	5	Cloacal	0	1	0
Inoculated	140	6	Cloacal	0	1	0
Inoculated	140	7	Cloacal	0	1	0
Inoculated	142	1	Cloacal	9.79	10.79	1.03
Inoculated	142	2	Cloacal	0	1	0
Inoculated	142	3	Cloacal	0	1	0
Inoculated	142	4	Cloacal	0	1	0
Inoculated	142	5	Cloacal	0	1	0
Inoculated	142	6	Cloacal	0	1	0
Inoculated	142	7	Cloacal	0	1	0
Inoculated	108	1	Oral	406.43	407.43	2.61
Inoculated	108	2	Oral	2385.53	2386.53	3.38
Inoculated	108	3	Oral	28.41	29.41	1.47
Inoculated	108	4	Oral	17.44	18.44	1.27
Inoculated	108	5	Oral	51.34	52.34	1.72
Inoculated	108	6	Oral	13.79	14.79	1.17
Inoculated	108	7	Oral	6.27	7.27	0.86
Inoculated	109	1	Oral	7236.76	7237.76	3.86
Inoculated	109	2	Oral	5057.74	5058.74	3.7
Inoculated	109	3	Oral	1259.11	1260.11	3.1
Inoculated	109	4	Oral	216.72	217.72	2.34
Inoculated	109	5	Oral	549.51	550.51	2.74
Inoculated	109	6	Oral	136.26	137.26	2.14
Inoculated	109	7	Oral	2.77	3.77	0.58
Inoculated	111	1	Oral	4841.23	4842.23	3.69
Inoculated	111	2	Oral	156.93	157.93	2.2
Inoculated	111	3	Oral	2614.97	2615.97	3.42
Inoculated	111	4	Oral	3041.32	3042.32	3.48
Inoculated	111	5	Oral	1.48	2.48	0.4
Inoculated	111	6	Oral	0	1	0
Inoculated	111	7	Oral	0	1	0
Inoculated	112	1	Oral	3461.39	3462.39	3.54
Inoculated	112	2	Oral	6904.46	6905.46	3.84
Inoculated	112	3	Oral	3647.25	3648.25	3.56
Inoculated	112	4	Oral	1717.99	1718.99	3.24
Inoculated	112	5	Oral	2272.78	2273.78	3.36
Inoculated	112	6	Oral	17.83	18.83	1.27
Inoculated	112	7	Oral	4.47	5.47	0.74
Inoculated	113	1	Oral	6868.87	6869.87	3.84
Inoculated	113	2	Oral	9441.24	9442.24	3.98
Inoculated	113	3	Oral	3123.76	3124.76	3.49
Inoculated	113	4	Oral	2165.27	2166.27	3.34
Inoculated	113	5	Oral	447.15	448.15	2.65
Inoculated	113	6	Oral	180.98	181.98	2.26
Inoculated	113	7	Oral	10.3	11.3	1.05
Inoculated	114	1	Oral	0	1	0
Inoculated	114	2	Oral	0	1	0
Inoculated	114	3	Oral	0	1	0
Inoculated	114	4	Oral	0	1	0
Inoculated	114	5	Oral	0	1	0
Inoculated	114	6	Oral	0	1	0
Inoculated	114	7	Oral	0	1	0
Inoculated	117	1	Oral	5786.39	5787.39	3.76
Inoculated	117	2	Oral	6270.32	6271.32	3.8
Inoculated	117	3	Oral	124.91	125.91	2.1
Inoculated	117	4	Oral	1061.97	1062.97	3.03
Inoculated	117	5	Oral	42.92	43.92	1.64
Inoculated	117	6	Oral	5.92	6.92	0.84
Inoculated	117	7	Oral	3.01	4.01	0.6
Inoculated	118	1	Oral	274.5	275.5	2.44
Inoculated	118	2	Oral	4284.06	4285.06	3.63
Inoculated	118	3	Oral	205.2	206.2	2.31
Inoculated	118	4	Oral	47.45	48.45	1.69
Inoculated	118	5	Oral	146.43	147.43	2.17
Inoculated	118	6	Oral	0	1	0
Inoculated	118	7	Oral	0	1	0
Inoculated	119	1	Oral	4038.27	4039.27	3.61
Inoculated	119	2	Oral	330.57	331.57	2.52
Inoculated	119	3	Oral	0	1	0
Inoculated	119	4	Oral	0	1	0
Inoculated	119	5	Oral	0	1	0
Inoculated	119	6	Oral	0	1	0
Inoculated	119	7	Oral	0	1	0
Inoculated	121	1	Oral	11.78	12.78	1.11
Inoculated	121	2	Oral	17.34	18.34	1.26
Inoculated	121	3	Oral	14.71	15.71	1.2
Inoculated	121	4	Oral	0	1	0
Inoculated	121	5	Oral	4.85	5.85	0.77
Inoculated	121	6	Oral	0	1	0
Inoculated	121	7	Oral	0	1	0
Inoculated	122	1	Oral	164632.37	164633.37	5.22
Inoculated	122	2	Oral	44593.35	44594.35	4.65
Inoculated	122	3	Oral	4539.04	4540.04	3.66
Inoculated	122	4	Oral	1831.05	1832.05	3.26
Inoculated	122	5	Oral	3436.66	3437.66	3.54
Inoculated	122	6	Oral	3.47	4.47	0.65
Inoculated	122	7	Oral	0	1	0
Inoculated	124	1	Oral	3713.53	3714.53	3.57
Inoculated	124	2	Oral	23350.57	23351.57	4.37
Inoculated	124	3	Oral	8299.72	8300.72	3.92
Inoculated	124	4	Oral	1997.59	1998.59	3.3
Inoculated	124	5	Oral	488.93	489.93	2.69
Inoculated	124	6	Oral	16.59	17.59	1.25
Inoculated	124	7	Oral	65.49	66.49	1.82
Inoculated	126	1	Oral	57849.84	57850.84	4.76
Inoculated	126	2	Oral	5055.22	5056.22	3.7
Inoculated	126	3	Oral	1380.41	1381.41	3.14
Inoculated	126	4	Oral	1896.4	1897.4	3.28
Inoculated	126	5	Oral	128.56	129.56	2.11
Inoculated	126	6	Oral	40.53	41.53	1.62
Inoculated	126	7	Oral	16.77	17.77	1.25
Inoculated	128	1	Oral	163.71	164.71	2.22
Inoculated	128	2	Oral	84.68	85.68	1.93
Inoculated	128	3	Oral	223.32	224.32	2.35
Inoculated	128	4	Oral	569.52	570.52	2.76
Inoculated	128	5	Oral	0.97	1.97	0.29
Inoculated	128	6	Oral	0	1	0
Inoculated	128	7	Oral	0	1	0
Inoculated	129	1	Oral	2490.84	2491.84	3.4
Inoculated	129	2	Oral	12092.35	12093.35	4.08
Inoculated	129	3	Oral	17190.93	17191.93	4.24
Inoculated	129	4	Oral	381.6	382.6	2.58
Inoculated	129	5	Oral	4.66	5.66	0.75
Inoculated	129	6	Oral	12.16	13.16	1.12
Inoculated	129	7	Oral	0	1	0
Inoculated	130	1	Oral	2752.05	2753.05	3.44
Inoculated	130	2	Oral	3618.76	3619.76	3.56
Inoculated	130	3	Oral	5040.76	5041.76	3.7
Inoculated	130	4	Oral	954.8	955.8	2.98
Inoculated	130	5	Oral	1756.42	1757.42	3.24
Inoculated	130	6	Oral	0.89	1.89	0.28
Inoculated	130	7	Oral	0	1	0
Inoculated	135	1	Oral	8676.37	8677.37	3.94
Inoculated	135	2	Oral	2369.5	2370.5	3.37
Inoculated	135	3	Oral	1448.51	1449.51	3.16
Inoculated	135	4	Oral	1516.69	1517.69	3.18
Inoculated	135	5	Oral	203.95	204.95	2.31
Inoculated	135	6	Oral	0	1	0
Inoculated	135	7	Oral	0	1	0
Inoculated	139	1	Oral	558.97	559.97	2.75
Inoculated	139	2	Oral	1264.11	1265.11	3.1
Inoculated	139	3	Oral	1741.86	1742.86	3.24
Inoculated	139	4	Oral	919.75	920.75	2.96
Inoculated	139	5	Oral	185.23	186.23	2.27
Inoculated	139	6	Oral	39.27	40.27	1.61
Inoculated	139	7	Oral	2.78	3.78	0.58
Inoculated	140	1	Oral	3.14	4.14	0.62
Inoculated	140	2	Oral	200.65	201.65	2.3
Inoculated	140	3	Oral	719.16	720.16	2.86
Inoculated	140	4	Oral	66.9	67.9	1.83
Inoculated	140	5	Oral	51.12	52.12	1.72
Inoculated	140	6	Oral	4400.51	4401.51	3.64
Inoculated	140	7	Oral	1.33	2.33	0.37
Inoculated	142	1	Oral	3919.61	3920.61	3.59
Inoculated	142	2	Oral	5944.96	5945.96	3.77
Inoculated	142	3	Oral	2647.32	2648.32	3.42
Inoculated	142	4	Oral	2246.46	2247.46	3.35
Inoculated	142	5	Oral	43.16	44.16	1.65
Inoculated	142	6	Oral	0	1	0
Inoculated	142	7	Oral	0	1	0
